# Supplementary material for: Two-step phosphorescent mechanochromism due to intramolecular deformation
Source: Royal Society of Chemistry journal article supplement (doi:10.1039/c9tc05879f), 2019-11-26
Supplement: c9tc05879f1.pdf [file c9tc05879f1.pdf]

# Electronic Supplementary Information

## **Two-step Phosphorescent Mechanochromism Due to Intramolecular Deformation**

Xu Zhang,\* Li-Yi Zhang, Jin-Yun Wang, Feng-Rong Dai and Zhong-Ning Chen\*

*State Key Laboratory of Structural Chemistry, Fujian Institute of Research on the Structure of Matter,  
Chinese Academy of Sciences, Fuzhou, Fujian 350002, China*

**Table S1.** Crystallographic data of Pt<sub>2</sub>Cu complex **1** with different solvate molecules.

|                                                         | <b>1</b> ·4CH <sub>2</sub> Cl <sub>2</sub>                                                        | <b>1</b> ·3acetone                                                                   | <b>1</b> ·4THF                                                                       |
|---------------------------------------------------------|---------------------------------------------------------------------------------------------------|--------------------------------------------------------------------------------------|--------------------------------------------------------------------------------------|
| empirical formula                                       | C <sub>108</sub> H <sub>99</sub> Cl <sub>9</sub> CuNO <sub>4</sub> P <sub>6</sub> Pt <sub>2</sub> | C <sub>113</sub> H <sub>109</sub> ClCuNO <sub>7</sub> P <sub>6</sub> Pt <sub>2</sub> | C <sub>120</sub> H <sub>124</sub> ClCuNO <sub>8</sub> P <sub>6</sub> Pt <sub>2</sub> |
| formula weight                                          | 2433.47                                                                                           | 2268.00                                                                              | 2383.19                                                                              |
| crystal system                                          | monoclinic                                                                                        | triclinic                                                                            | monoclinic                                                                           |
| space group                                             | <i>C2/c</i>                                                                                       | <i>P</i> $\bar{1}$                                                                   | <i>P2</i> <sub>1</sub> / <i>n</i>                                                    |
| <i>a</i> (Å)                                            | 15.370(5)                                                                                         | 15.936(3)                                                                            | 15.2879(18)                                                                          |
| <i>b</i> (Å)                                            | 26.440(8)                                                                                         | 16.420(4)                                                                            | 25.337(3)                                                                            |
| <i>c</i> (Å)                                            | 25.463(8)                                                                                         | 21.180(4)                                                                            | 28.373(4)                                                                            |
| $\alpha$ (deg)                                          | 90                                                                                                | 73.227(3)                                                                            | 90                                                                                   |
| $\beta$ (deg)                                           | 91.741(5)                                                                                         | 84.428(6)                                                                            | 94.403(3)                                                                            |
| $\gamma$ (deg)                                          | 90                                                                                                | 88.948(6)                                                                            | 90                                                                                   |
| <i>V</i> (Å <sup>3</sup> )                              | 10343(5)                                                                                          | 5280.6(19)                                                                           | 10958(2)                                                                             |
| <i>Z</i>                                                | 4                                                                                                 | 2                                                                                    | 4                                                                                    |
| $\rho_{\text{calcd}}$ (g/cm <sup>-3</sup> )             | 1.563                                                                                             | 1.426                                                                                | 1.445                                                                                |
| $\mu$ (mm <sup>-1</sup> )                               | 3.279                                                                                             | 3.012                                                                                | 2.908                                                                                |
| radiation ( $\lambda$ , Å)                              | 0.71073                                                                                           | 0.71073                                                                              | 0.71073                                                                              |
| temperature (K)                                         | 293(2)                                                                                            | 293(2)                                                                               | 293(2)                                                                               |
| completeness                                            | 99.0                                                                                              | 99.0                                                                                 | 99.6                                                                                 |
| GOF                                                     | 1.040                                                                                             | 1.104                                                                                | 1.128                                                                                |
| R1 ( <i>F</i> <sub>o</sub> ) <sup>a</sup>               | 0.0622                                                                                            | 0.0464                                                                               | 0.0517                                                                               |
| wR2 ( <i>F</i> <sub>o</sub> <sup>2</sup> ) <sup>b</sup> | 0.2339                                                                                            | 0.1389                                                                               | 0.1978                                                                               |

**Table S2.** Partial Molecular Orbital Compositions (%) in the Ground State for Pt<sub>2</sub>Cu Complex **1** in the CH<sub>2</sub>Cl<sub>2</sub> Solution by TD-DFT Method at the B3LYP Level.

| orbital | energy<br>(eV) | MO contribution (%) |                  |       |       |                                  |
|---------|----------------|---------------------|------------------|-------|-------|----------------------------------|
|         |                | Pt (s/p/d)          | Cu (s/p/d)       | dpmp  | decz  | C≡CC <sub>6</sub> H <sub>5</sub> |
| LUMO+9  | -1.02          | 14.57 (40/39/21)    | 3.20 (53/42/6)   | 52.01 | 22.06 | 8.17                             |
| LUMO+8  | -1.09          | 8.61 (36/47/16)     | 2.85 (53/37/9)   | 58.06 | 26.68 | 3.80                             |
| LUMO+7  | -1.13          | 15.42 (48/38/14)    | 1.97 (19/71/10)  | 76.30 | 2.76  | 3.55                             |
| LUMO+5  | -1.27          | 23.35 (68/8/25)     | 6.44 (82/16/3)   | 58.03 | 5.99  | 6.19                             |
| LUMO+4  | -1.29          | 8.36 (14/49/37)     | 1.64 (24/52/24)  | 83.21 | 2.59  | 4.20                             |
| LUMO+3  | -1.37          | 20.87 (36/16/48)    | 6.61 (79/19/3)   | 63.98 | 5.33  | 3.22                             |
| LUMO+2  | -1.40          | 11.54 (45/10/45)    | 2.69 (58/26/15)  | 78.39 | 2.35  | 5.02                             |
| LUMO+1  | -1.64          | 24.28 (51/25/24)    | 6.75 (42/52/6)   | 57.91 | 3.63  | 7.42                             |
| LUMO    | -1.87          | 14.07 (14/67/19)    | 9.13 (58/32/10)  | 61.22 | 5.84  | 9.74                             |
| HOMO    | -5.15          | 5.95 (3/7/90)       | 0.31 (11/81/9)   | 5.64  | 87.04 | 1.07                             |
| HOMO-1  | -5.65          | 17.15 (8/2/90)      | 4.50 (46/23/31)  | 4.93  | 48.13 | 25.30                            |
| HOMO-2  | -5.73          | 16.12 (13/3/84)     | 10.66 (66/10/24) | 7.61  | 36.58 | 29.04                            |
| HOMO-3  | -5.89          | 22.52 (9/2/90)      | 18.25 (12/9/79)  | 11.78 | 10.55 | 36.90                            |
| HOMO-5  | -6.31          | 27.63 (5/2/92)      | 13.73 (11/4/85)  | 13.37 | 28.03 | 17.24                            |

**Table S3.** The Absorption Transitions for Pt<sub>2</sub>Cu Complex **1** in the CH<sub>2</sub>Cl<sub>2</sub> Solution by TD-DFT Method at the B3LYP Level.

| state           | <i>E</i> , nm (eV) | O.S.   | transition (contri.)                                                                | assignment                                                                                                                                                                                 | exp. (nm) |
|-----------------|--------------------|--------|-------------------------------------------------------------------------------------|--------------------------------------------------------------------------------------------------------------------------------------------------------------------------------------------|-----------|
| S <sub>1</sub>  | 448 (2.77)         | 0.0036 | HOMO→LUMO (95%)                                                                     | <sup>1</sup> LLCT/ <sup>1</sup> LMCT                                                                                                                                                       |           |
| S <sub>2</sub>  | 409 (3.03)         | 0.0223 | HOMO→LUMO+1 (92%)                                                                   | <sup>1</sup> LLCT/ <sup>1</sup> LMCT                                                                                                                                                       | 405       |
| S <sub>3</sub>  | 384 (3.23)         | 0.0700 | HOMO-1→LUMO (63%)<br>HOMO-3→LUMO (13%)<br>HOMO→LUMO+3 (10%)                         | <sup>1</sup> LLCT/ <sup>1</sup> MC<br><sup>1</sup> LLCT/ <sup>1</sup> MC/ <sup>1</sup> MLCT/ <sup>1</sup> IL<br><sup>1</sup> LLCT/ <sup>1</sup> LMCT                                       | 372       |
| S <sub>8</sub>  | 364 (3.41)         | 0.0668 | HOMO→LUMO+4 (44%)<br>HOMO→LUMO+5 (34%)                                              | <sup>1</sup> LLCT<br><sup>1</sup> LLCT/ <sup>1</sup> LMCT                                                                                                                                  |           |
| S <sub>10</sub> | 357 (3.48)         | 0.0831 | HOMO-1→LUMO+1 (45%)<br>HOMO-2→LUMO+1 (20%)<br>HOMO-2→LUMO (10%)<br>HOMO→LUMO+5 (9%) | <sup>1</sup> LLCT/ <sup>1</sup> MC/ <sup>1</sup> LMCT<br><sup>1</sup> LLCT/ <sup>1</sup> MC<br><sup>1</sup> LLCT/ <sup>1</sup> MC<br><sup>1</sup> LLCT/ <sup>1</sup> LMCT                  | 356       |
| S <sub>12</sub> | 349 (3.56)         | 0.1377 | HOMO-2→LUMO+1 (35%)<br>HOMO→LUMO+9 (14%)<br>HOMO-1→LUMO+1 (12%)                     | <sup>1</sup> LLCT/ <sup>1</sup> MC<br><sup>1</sup> LLCT/ <sup>1</sup> IL/ <sup>1</sup> LMCT<br><sup>1</sup> LLCT/ <sup>1</sup> MC/ <sup>1</sup> LMCT                                       |           |
| S <sub>13</sub> | 345 (3.60)         | 0.1938 | HOMO→LUMO+8 (30%)<br>HOMO→LUMO+7 (14%)<br>HOMO-3→LUMO+1 (13%)<br>HOMO-2→LUMO+1 (9%) | <sup>1</sup> LLCT/ <sup>1</sup> IL<br><sup>1</sup> LLCT/ <sup>1</sup> LMCT<br><sup>1</sup> MC/ <sup>1</sup> LLCT/ <sup>1</sup> IL/ <sup>1</sup> MLCT<br><sup>1</sup> LLCT/ <sup>1</sup> MC |           |
| S <sub>24</sub> | 322 (3.85)         | 0.1376 | HOMO-3→LUMO+2 (28%)<br>HOMO-5→LUMO+1 (11%)                                          | <sup>1</sup> LLCT/ <sup>1</sup> MLCT/ <sup>1</sup> MC/ <sup>1</sup> IL<br><sup>1</sup> LLCT/ <sup>1</sup> MC/ <sup>1</sup> IL/ <sup>1</sup> MLCT                                           | 312       |

**Table S4.** Partial Molecular Orbital Compositions (%) and Emission Transition in the Lowest Triplet State for Pt<sub>2</sub>Cu Complex **1** in the CH<sub>2</sub>Cl<sub>2</sub> Solution by TD-DFT Method at the B3LYP Level.

| orbital | energy (eV) | MO contribution (%) |                 |       |       |                                  |
|---------|-------------|---------------------|-----------------|-------|-------|----------------------------------|
|         |             | Pt (s/p/d)          | Cu (s/p/d)      | dpmp  | decz  | C≡CC <sub>6</sub> H <sub>5</sub> |
| LUMO    | -2.44       | 26.44 (41/19/40)    | 4.75 (48/42/10) | 55.03 | 6.69  | 7.09                             |
| HOMO    | -4.98       | 7.51 (4/12/85)      | 0.65 (2/90/8)   | 4.66  | 85.99 | 1.19                             |

| state          | <i>E</i> , nm (eV) | O.S.   | transition (Contri.) | assignment                           | exp. (nm) |
|----------------|--------------------|--------|----------------------|--------------------------------------|-----------|
| T <sub>1</sub> | 649 (1.91)         | 0.0000 | HOMO→LUMO (89%)      | <sup>3</sup> LLCT/ <sup>3</sup> LMCT | 672       |

**Table S5.** Partial Molecular Orbital Compositions (%) in the Lowest Triplet State for **1**·4THF, **1**·3acetone and **1**·4CH<sub>2</sub>Cl<sub>2</sub> by TD-DFT Method at the B3LYP Level.

| orbital                                    | energy (eV) | MO contribution (%) |                  |       |       |                                  |
|--------------------------------------------|-------------|---------------------|------------------|-------|-------|----------------------------------|
|                                            |             | Pt (s/p/d)          | Cu (s/p/d)       | dpmp  | decz  | C≡CC <sub>6</sub> H <sub>5</sub> |
| <b>1</b> ·4THF                             |             |                     |                  |       |       |                                  |
| LUMO                                       | -3.20       | 17.99 (41/49/10)    | 9.87 (37/52/11)  | 65.55 | 3.78  | 2.81                             |
| HOMO                                       | -6.33       | 6.51 (7/13/79)      | 0.31 (19/59/22)  | 5.24  | 86.54 | 1.40                             |
| <b>1</b> ·3acetone                         |             |                     |                  |       |       |                                  |
| LUMO                                       | -3.43       | 28.80 (57/27/16)    | 9.55 (21/75/4)   | 52.09 | 4.95  | 4.61                             |
| HOMO                                       | -6.36       | 5.97 (4/15/81)      | 0.59 (50/44/6)   | 4.17  | 88.25 | 1.03                             |
| <b>1</b> ·4CH <sub>2</sub> Cl <sub>2</sub> |             |                     |                  |       |       |                                  |
| LUMO                                       | -3.41       | 10.64 (6/83/12)     | 12.83 (68/21/11) | 70.68 | 4.16  | 1.69                             |
| HOMO                                       | -6.21       | 5.18 (2/4/94)       | 0.25 (0/85/15)   | 7.28  | 85.94 | 1.35                             |

**Table S6.** The Emission Transitions for **1**·4THF, **1**·3acetone and **1**·4CH<sub>2</sub>Cl<sub>2</sub> by TD-DFT Method at the B3LYP Level.

| state                                      | <i>E</i> , nm (eV) | O.S.   | transition (contri.) | assignment                           | exp. (nm) |
|--------------------------------------------|--------------------|--------|----------------------|--------------------------------------|-----------|
| <b>1</b> ·4THF                             | 491 (2.52)         | 0.0000 | HOMO→LUMO (80%)      | <sup>3</sup> LLCT/ <sup>3</sup> LMCT | 525       |
| <b>1</b> ·3acetone                         | 518 (2.39)         | 0.0000 | HOMO→LUMO (95%)      | <sup>3</sup> LLCT/ <sup>3</sup> LMCT | 556       |
| <b>1</b> ·4CH <sub>2</sub> Cl <sub>2</sub> | 560 (2.22)         | 0.0000 | HOMO→LUMO (93%)      | <sup>3</sup> LLCT/ <sup>3</sup> LMCT | 630       |

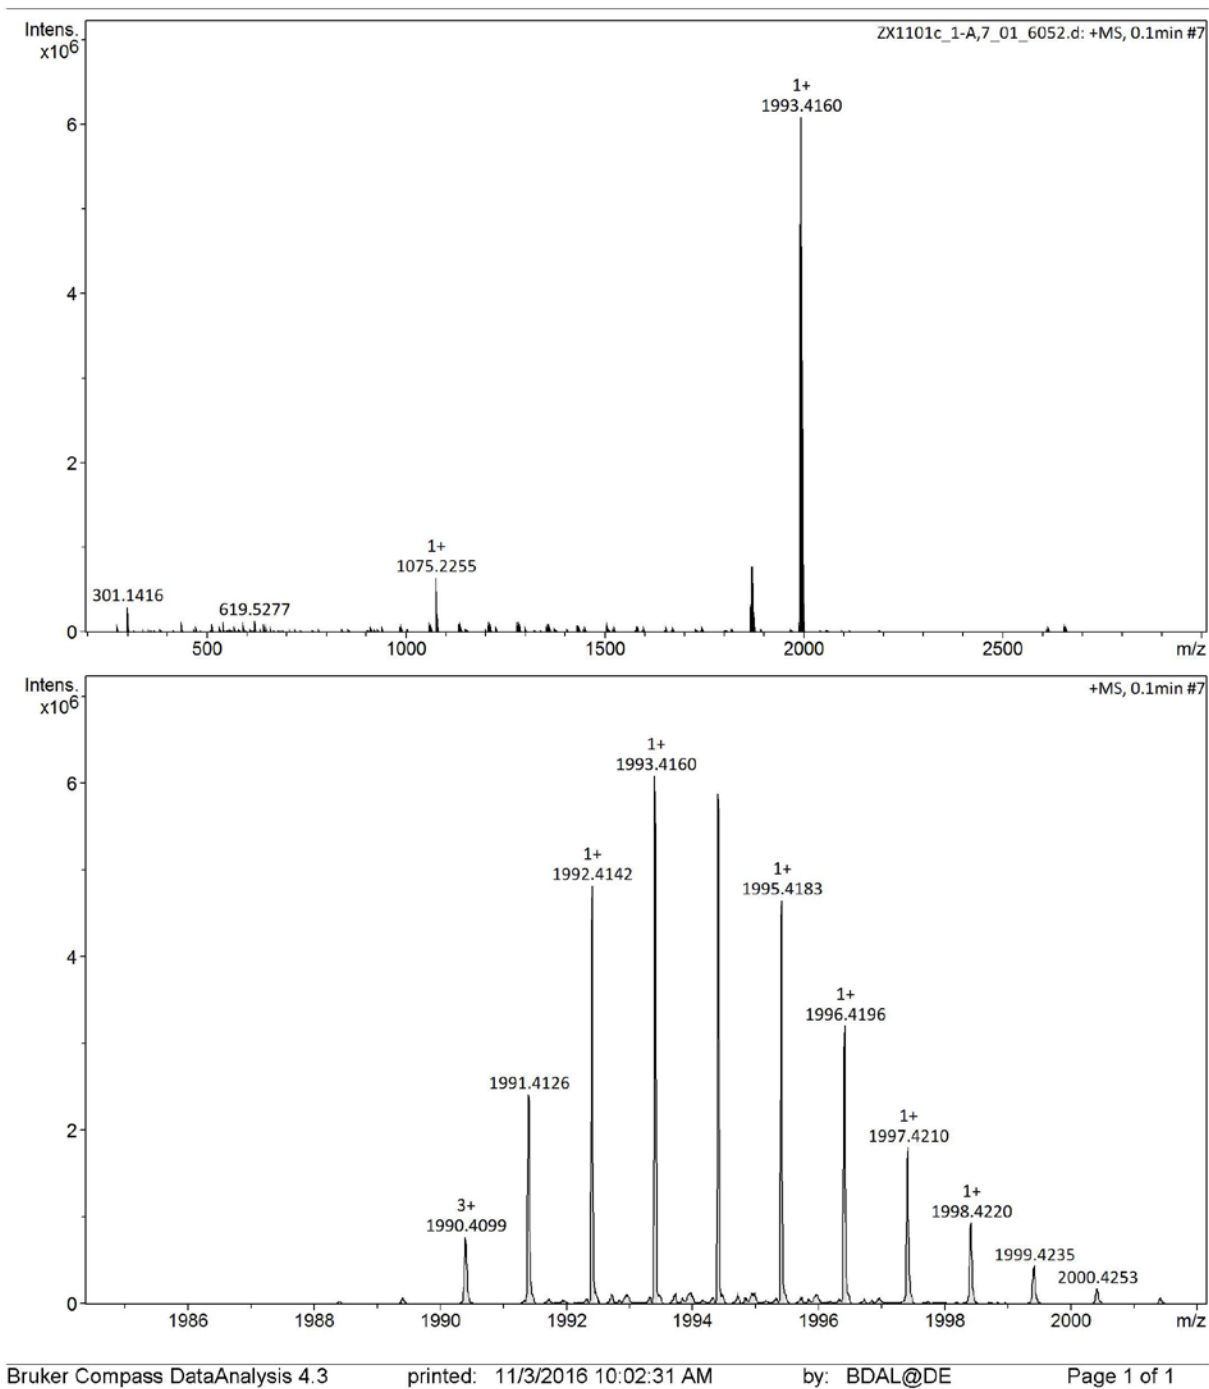

**Fig. S1.** High-resolution mass spectrometry of PtCu<sub>2</sub> complex **1**.

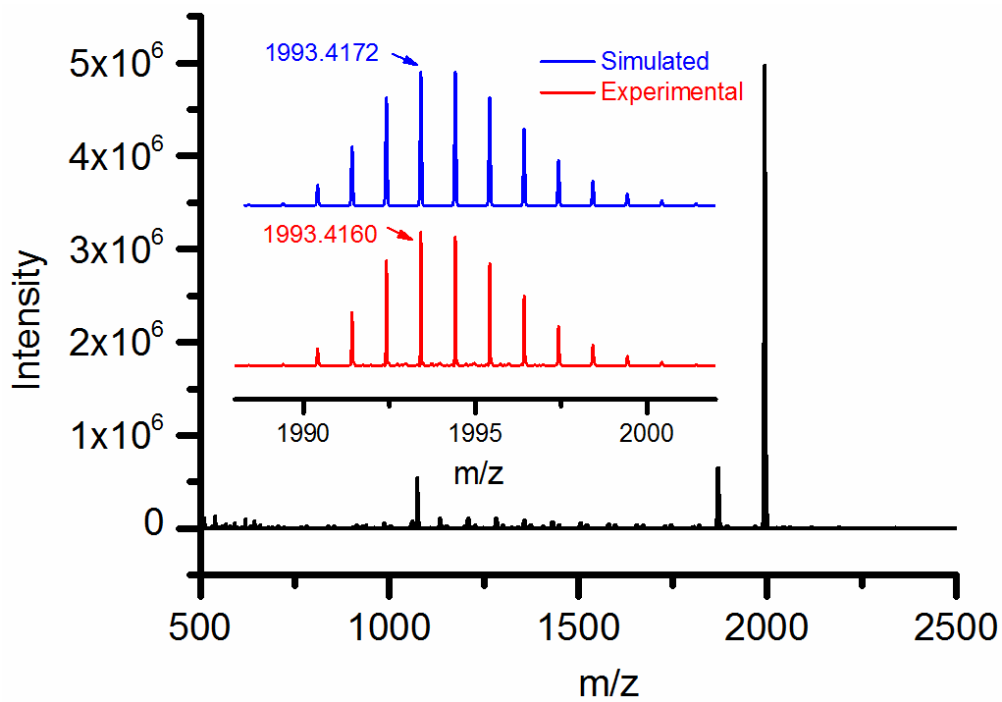

**Fig. S2.** High-resolution mass spectrometry of PtCu<sub>2</sub> complex **1**. Inset: The measured and simulated isotopic patterns.

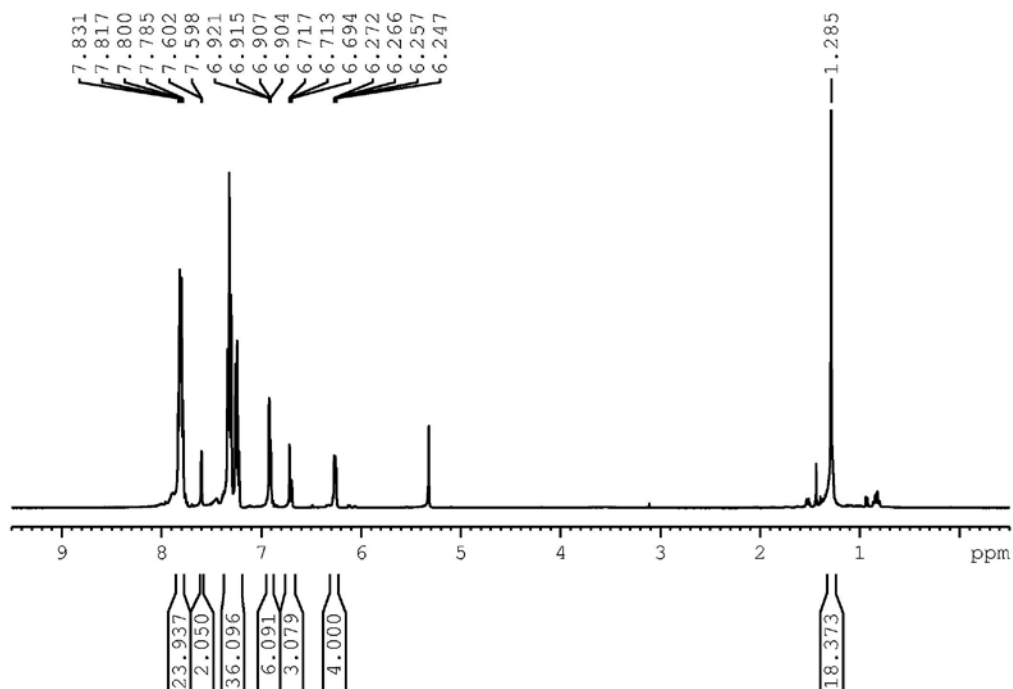

**Fig. S3.** The <sup>1</sup>H NMR spectrum of precursor complex Pt<sub>2</sub>(PPh<sub>3</sub>)<sub>4</sub>(μ-decz)(C≡CPh)<sub>2</sub> in CD<sub>2</sub>Cl<sub>2</sub> solution at ambient temperature.

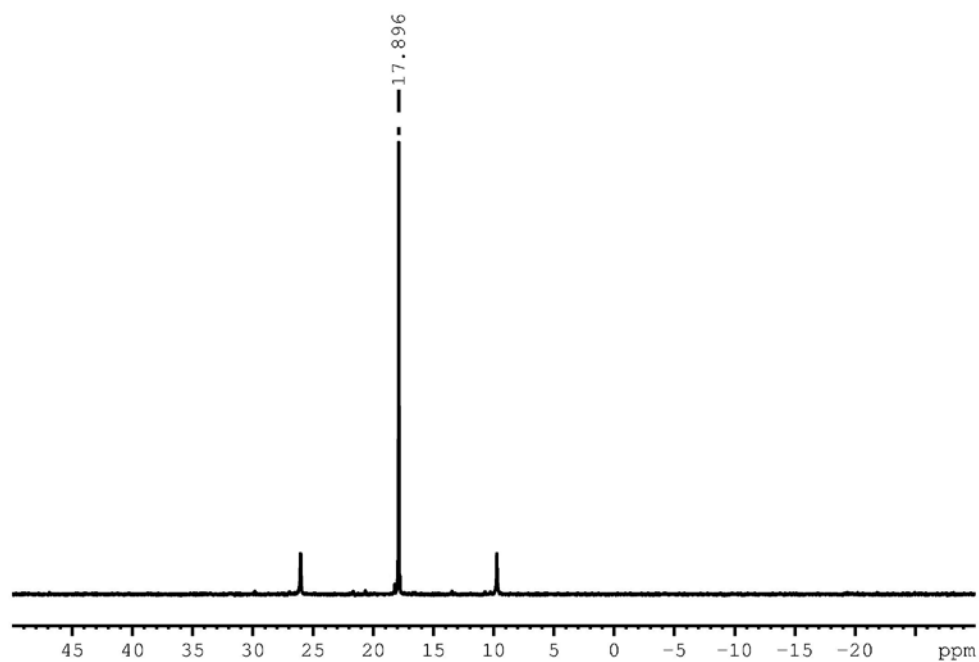

**Fig. S4.** The  $^{31}\text{P}\{^1\text{H}\}$  NMR spectrum of precursor complex  $\text{Pt}_2(\text{PPh}_3)_4(\mu\text{-decz})(\text{C}\equiv\text{CPh})_2$  in  $\text{CDCl}_3$  solution at ambient temperature.

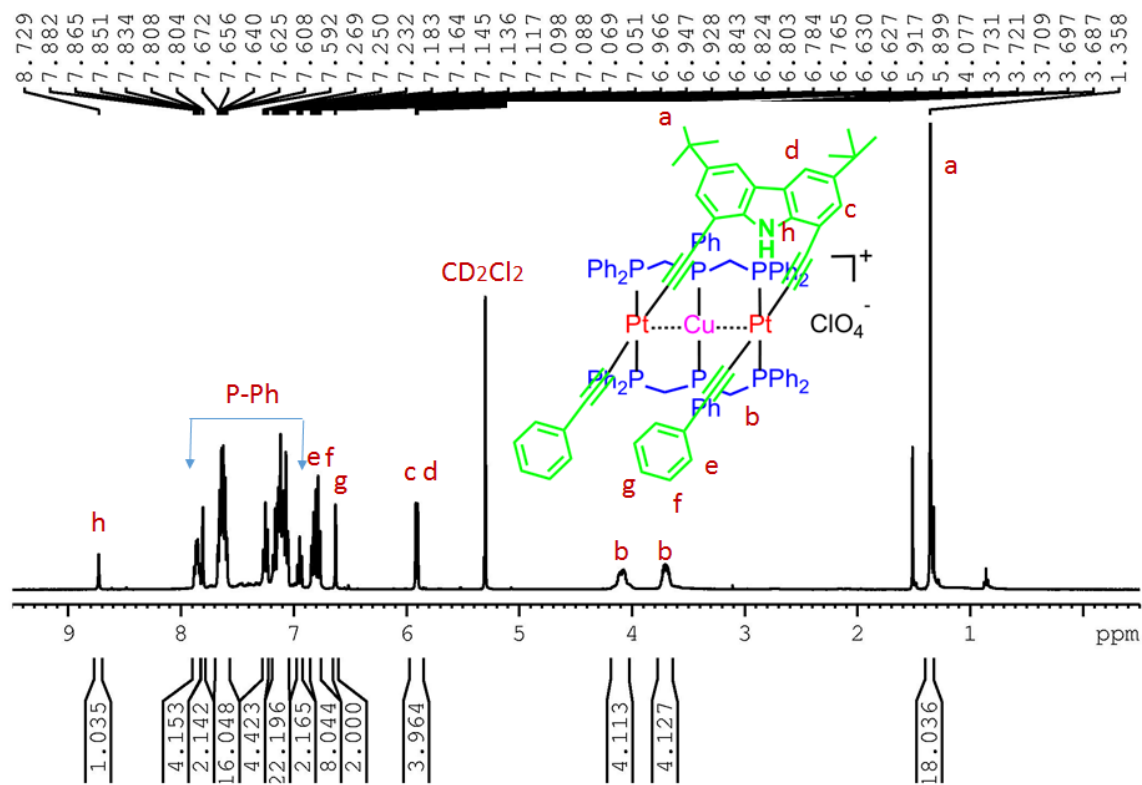

**Fig. S5.** The  $^1\text{H}$  NMR spectrum of  $\text{Pt}_2\text{Cu}$  complex **1** in  $\text{CD}_2\text{Cl}_2$  solution at ambient temperature.

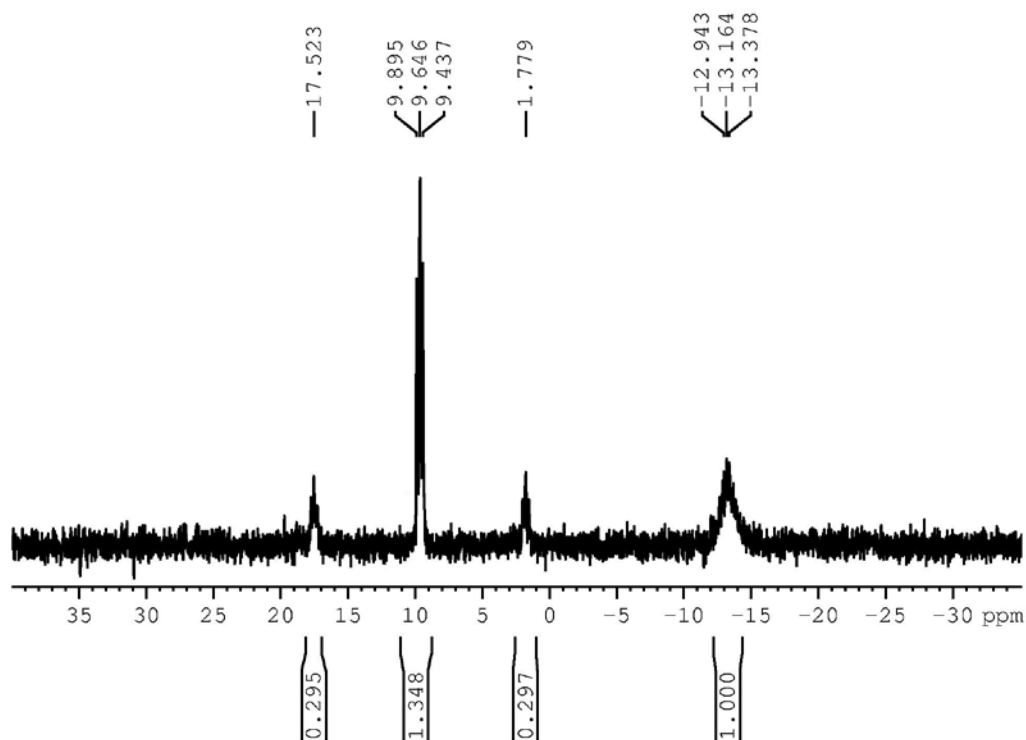

**Fig. S6.** The  $^{31}\text{P}\{^1\text{H}\}$  NMR spectrum of  $\text{Pt}_2\text{Cu}$  complex **1** in  $\text{CD}_2\text{Cl}_2$  solution at ambient temperature.

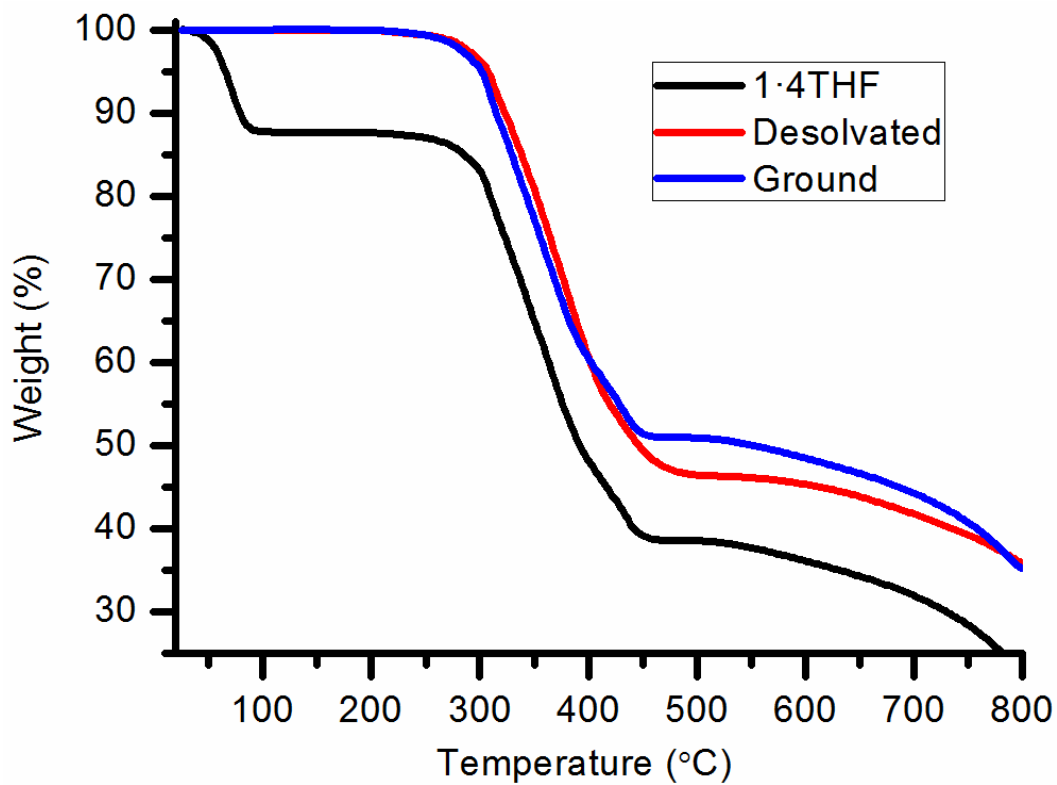

**Fig. S7.** The plots of thermogravimetric analyses of **1**·4THF, desolvated and ground species.



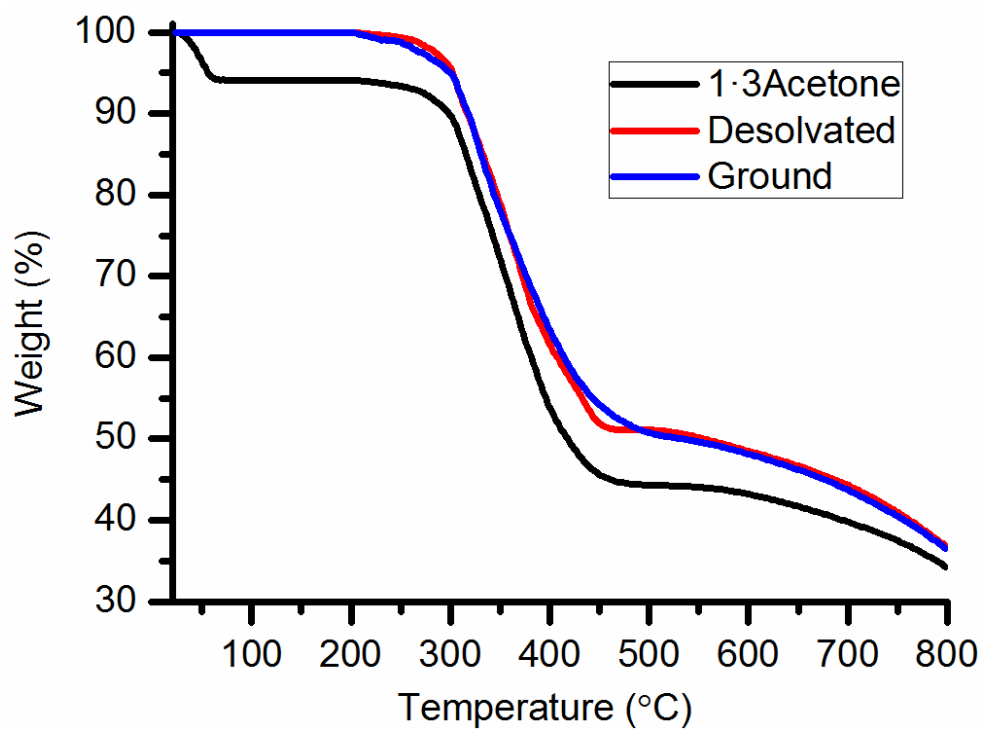

**Fig. S8.** The plots of thermogravimetric analyses of 1·3acetone, desolvated and ground species.

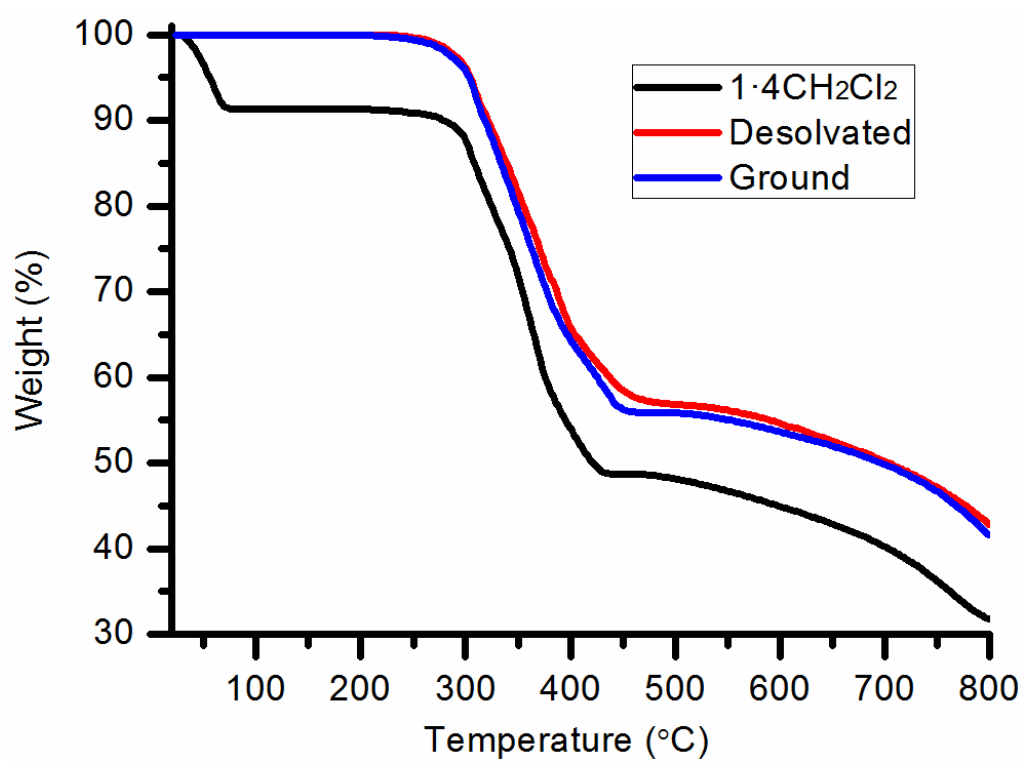

**Fig. S9.** The plots of thermogravimetric analyses of 1·4CH<sub>2</sub>Cl<sub>2</sub>, desolvated and ground species.

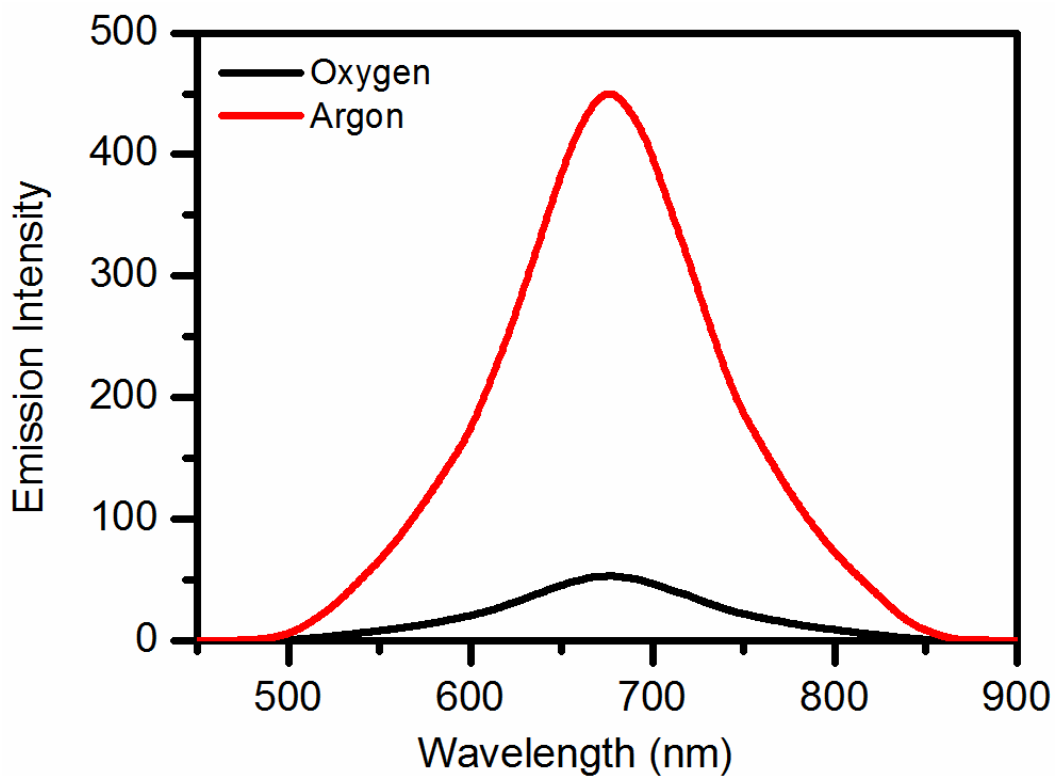

**Fig. S10.** The emission spectra of complex **1** in argon-bubbled and oxygen-bubbled CH<sub>2</sub>Cl<sub>2</sub> solution.

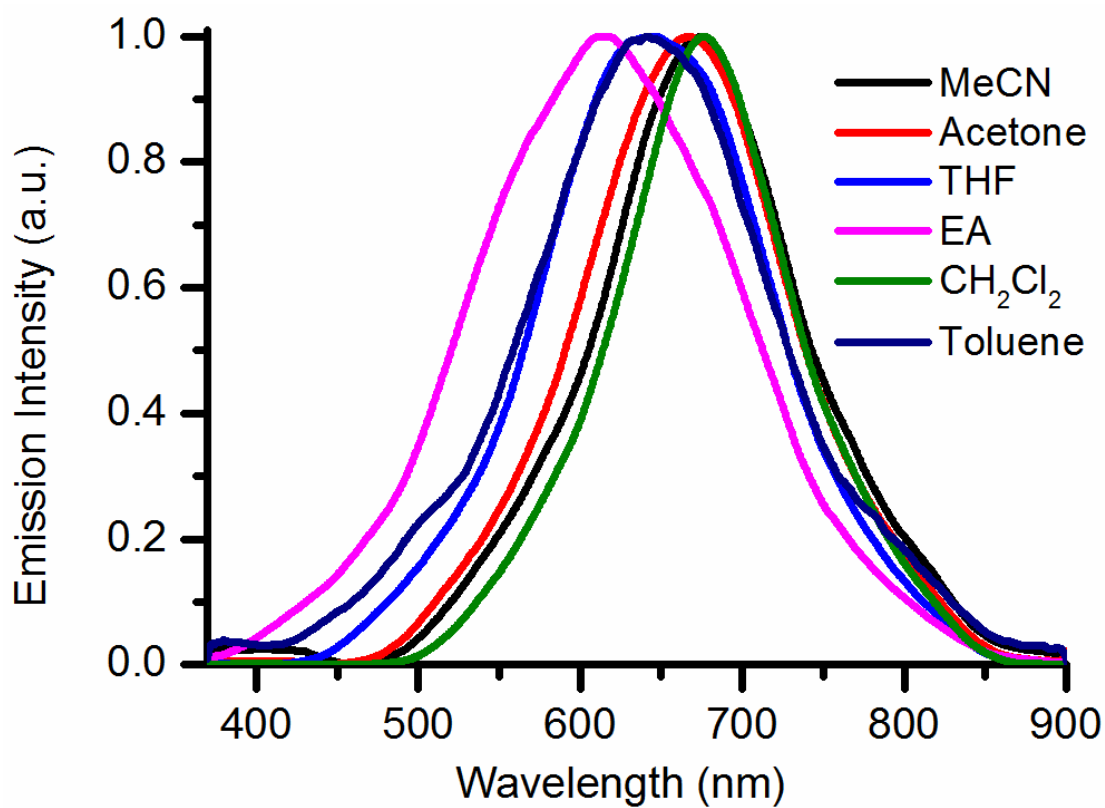

**Fig. S11.** The emission spectra of complex **1** in various solvent solution.

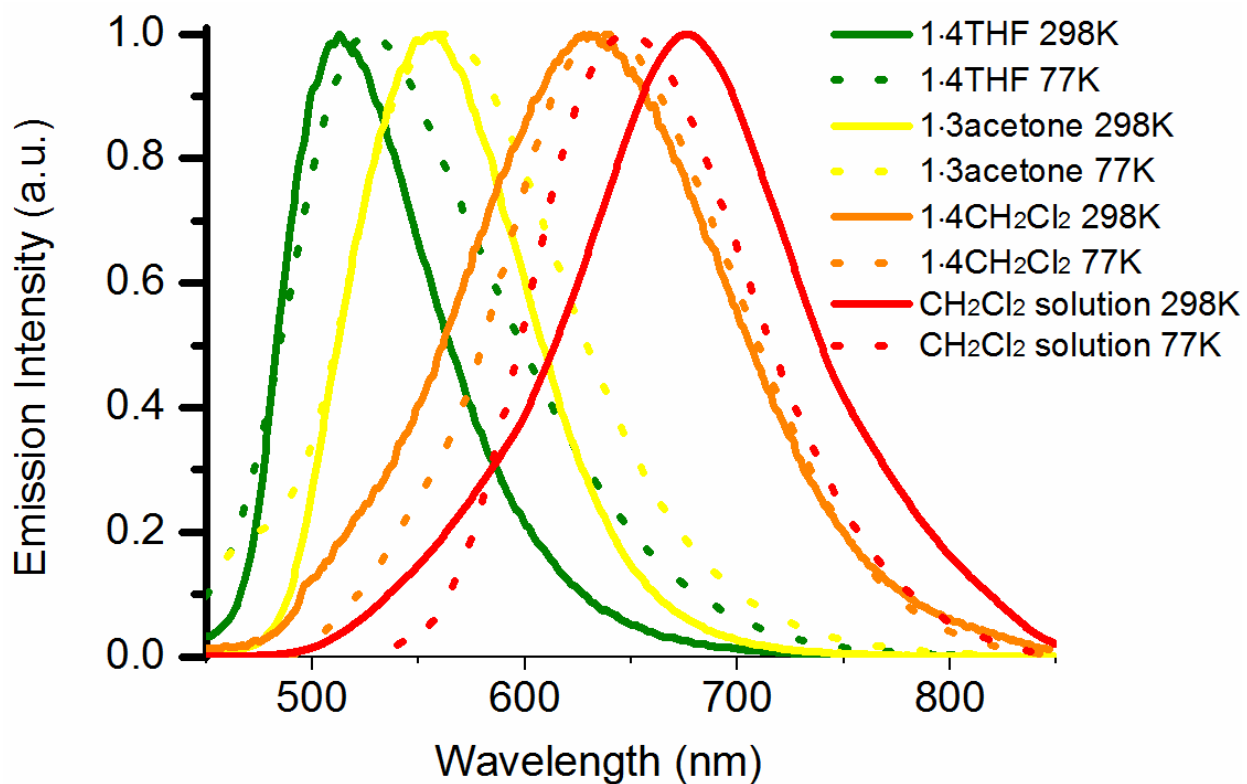

**Fig. S12.** The emission spectra of complex 1 in various states at 298K and 77K.

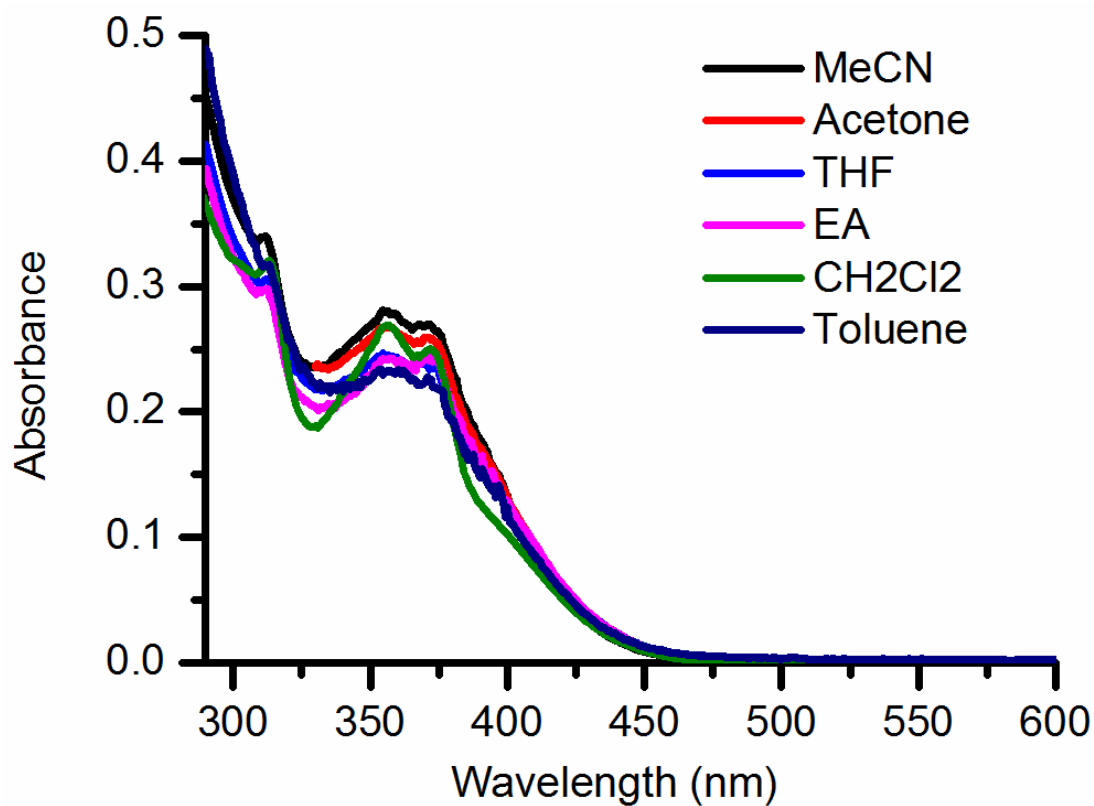

**Fig. S13.** UV-vis spectra of complex 1 in various solvent solution at 298K.

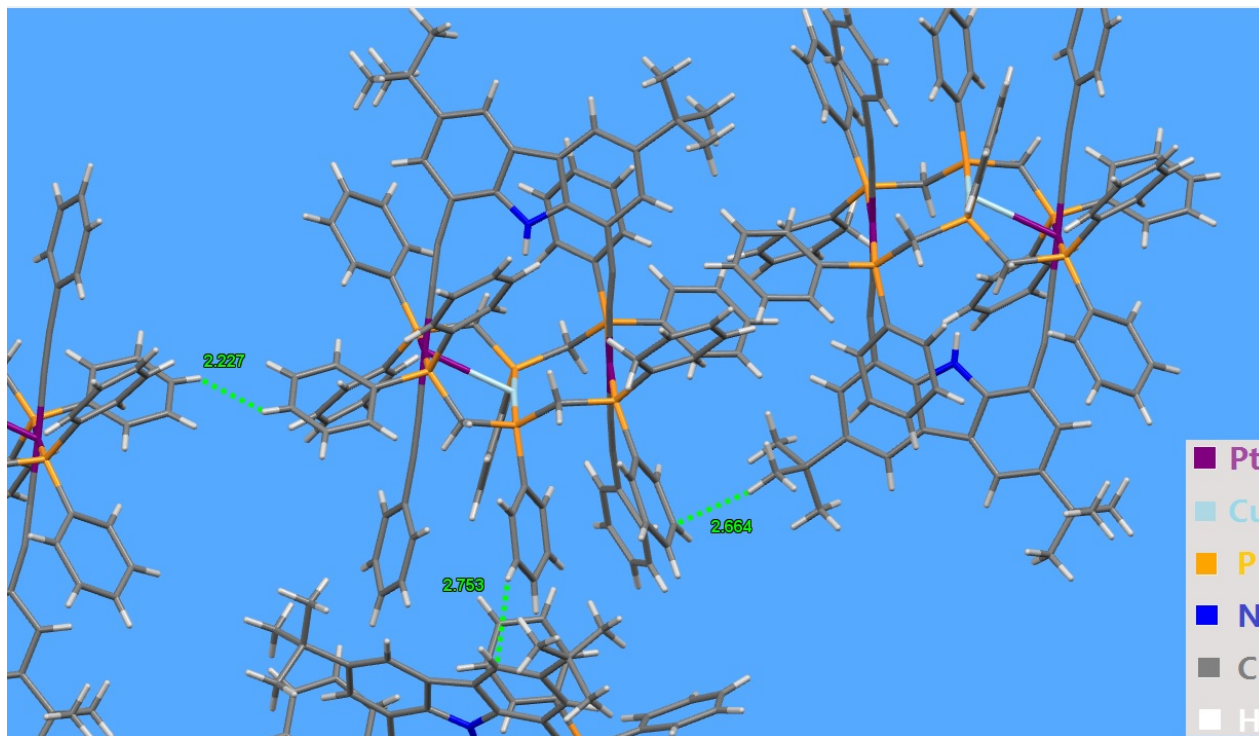

**Fig. S14.** Plot of molecular stacking in 1·4THF, showing weak intermolecular contacts.

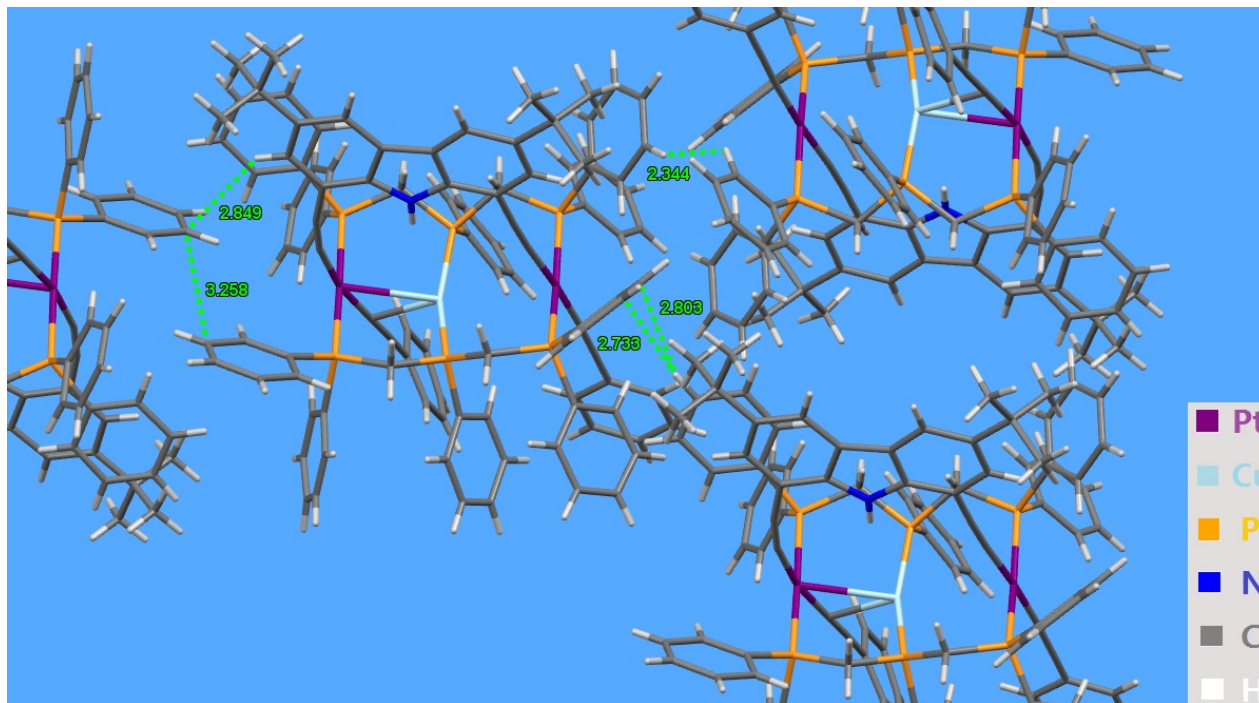

**Fig. S15.** Plot of molecular stacking in 1·3acetone, showing weak intermolecular contacts.

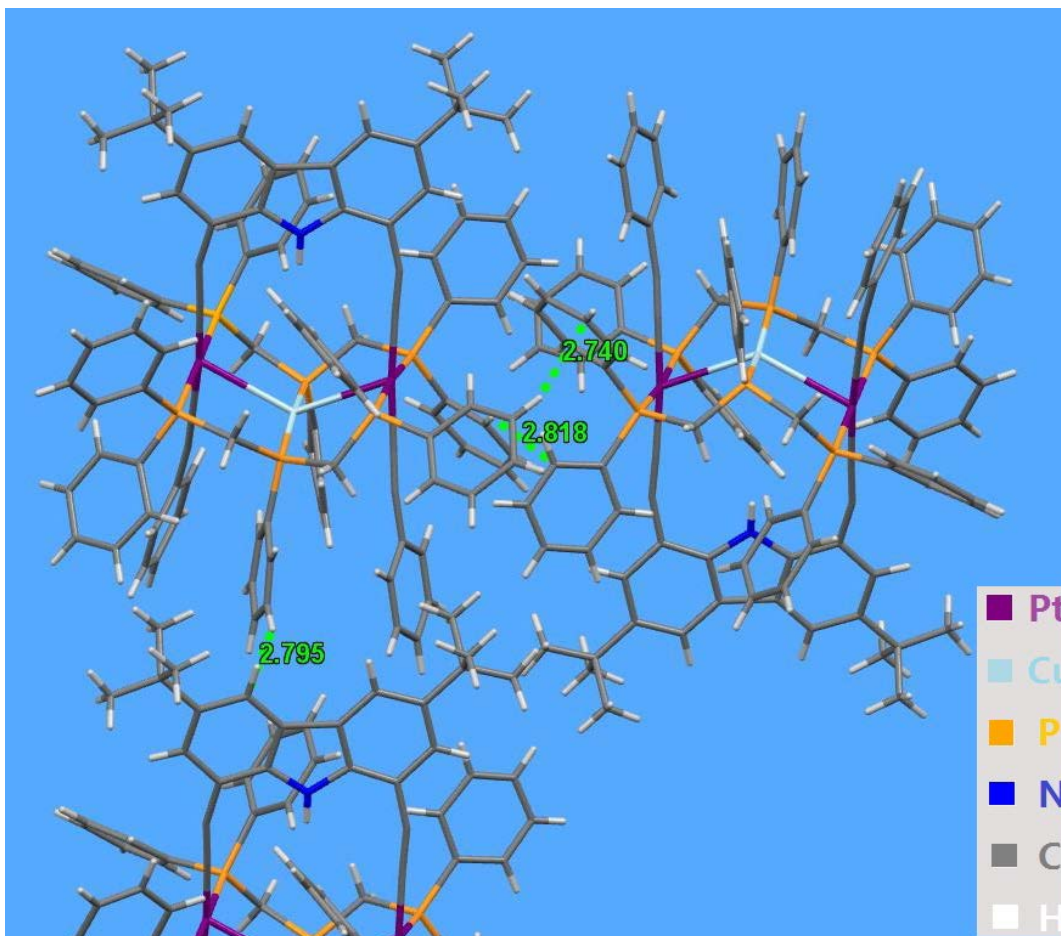

**Fig. S16.** Plot of molecular stacking in  $1 \cdot 4\text{CH}_2\text{Cl}_2$ , showing weak intermolecular contacts.

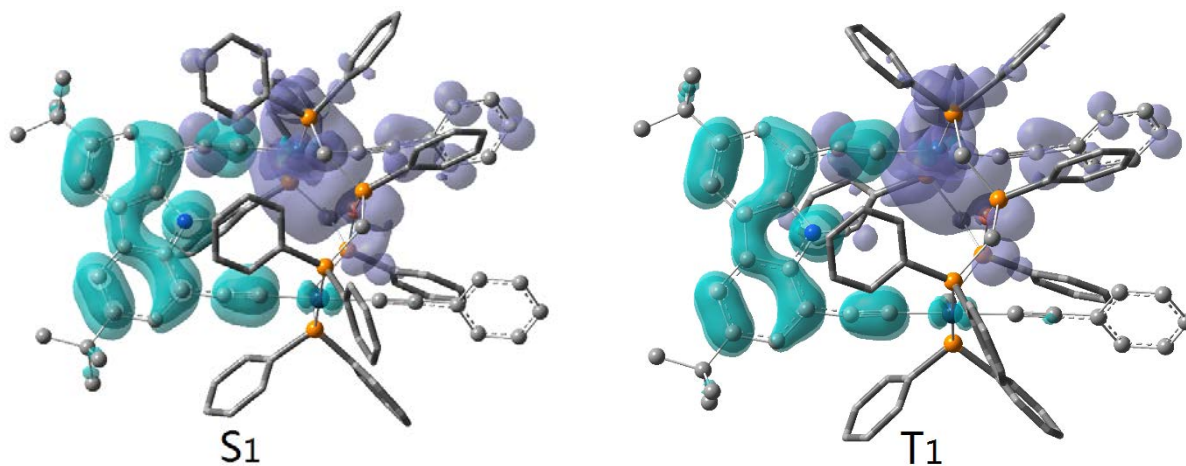

**Fig. S17.** The transition orbital distribution in the lowest singlet and triplet states for  $\text{Pt}_2\text{Cu}$  complex **1** in  $\text{CH}_2\text{Cl}_2$  by TD-DFT method at the B3LYP level (isovalue = 0.0006). The blue-green represents electron depletion (ED) region, and the purple stands for electron accumulation (EA) region. For clarity, the hydrogen atoms are omitted.

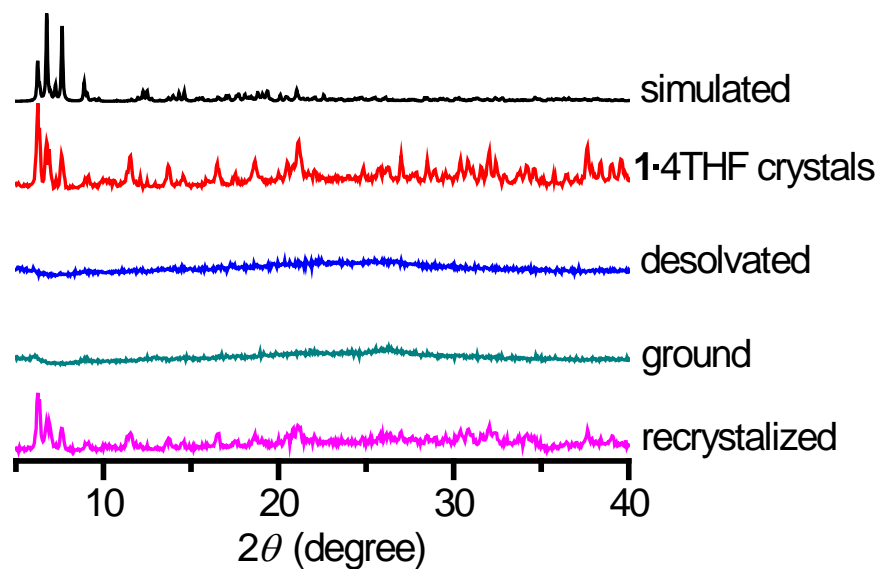

**Fig. S18.** The changes of X-ray diffraction (XRD) patterns for crystalline morp 1·4THF and the corresponding desolvated species in response to mechanical grinding, showing reversible reversion to the crystalline state upon recrystallization in THF.

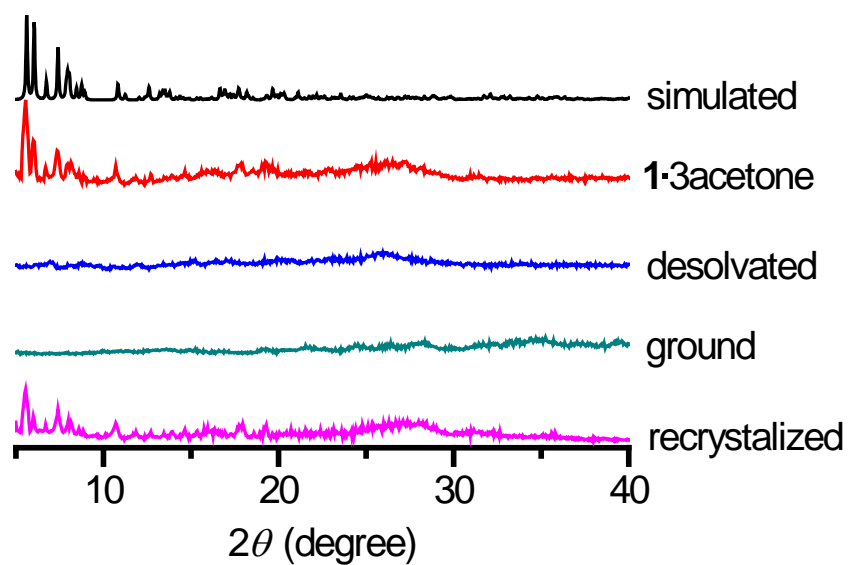

**Fig. S19.** The changes of X-ray diffraction (XRD) patterns for crystalline morp 1·3acetone and the corresponding desolvated species in response to mechanical grinding, showing reversible reversion to the crystalline state upon recrystallization in acetone.

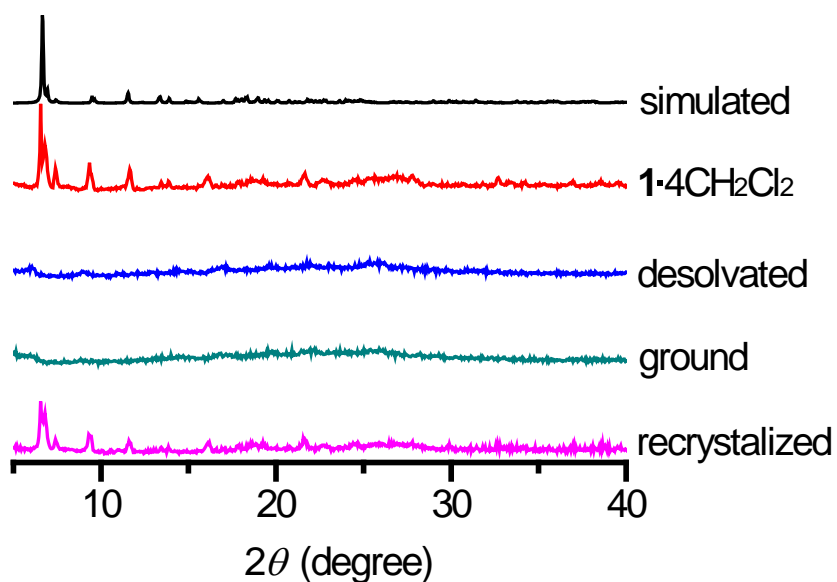

**Fig. S20.** The changes of X-ray diffraction (XRD) patterns for crystalline morph  $1 \cdot 4\text{CH}_2\text{Cl}_2$  and the corresponding desolvated species in response to mechanical grinding, showing reversible reversion to the crystalline state upon recrystallization in  $\text{CH}_2\text{Cl}_2$ .

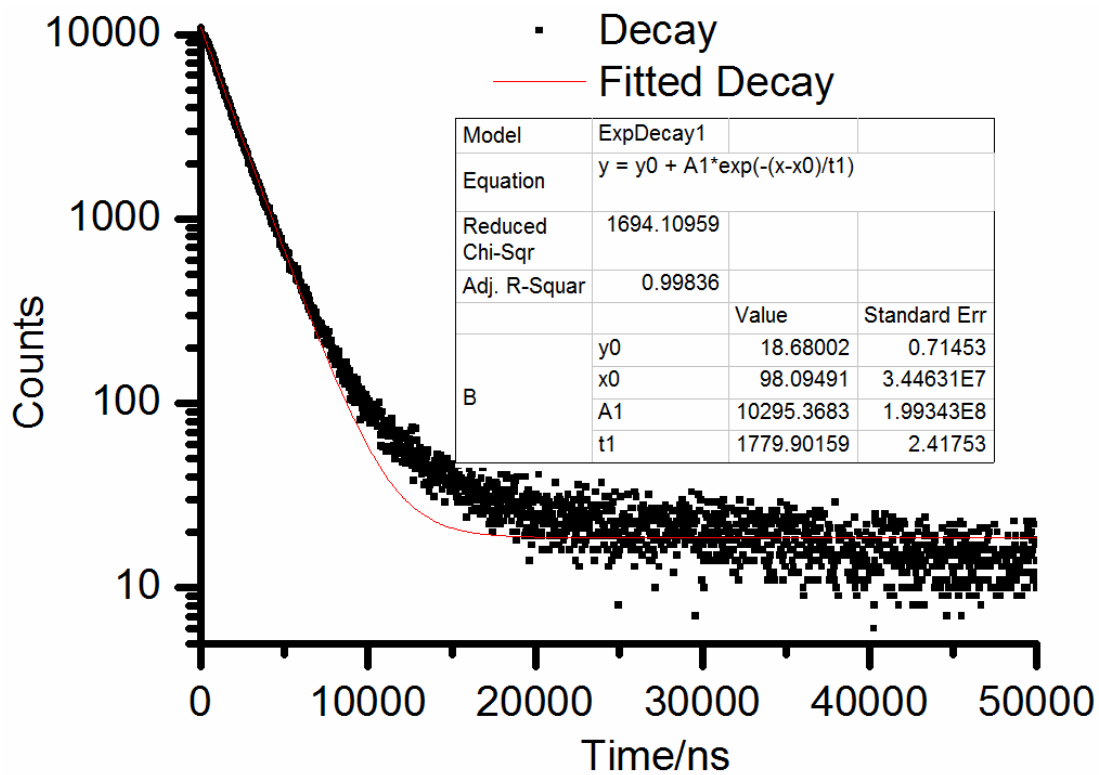

**Fig. S21.** The decay curve of crystal sample of  $1 \cdot 4\text{THF}$ .

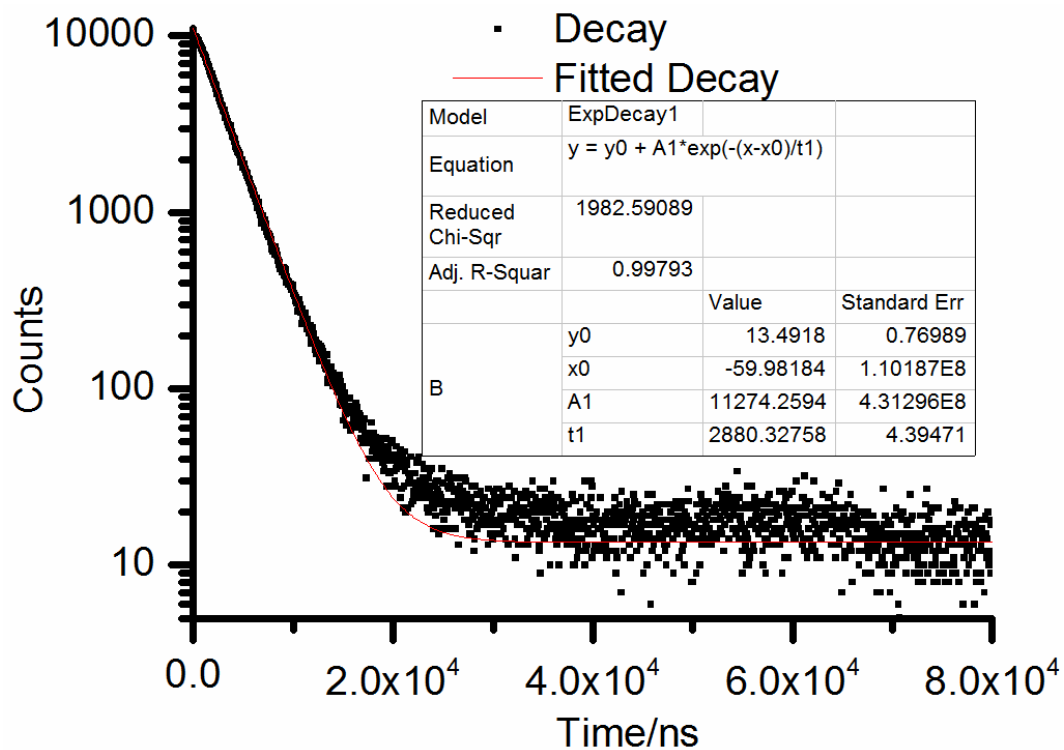

Fig. S22. The decay curve of desolvated sample of 1·4THF.

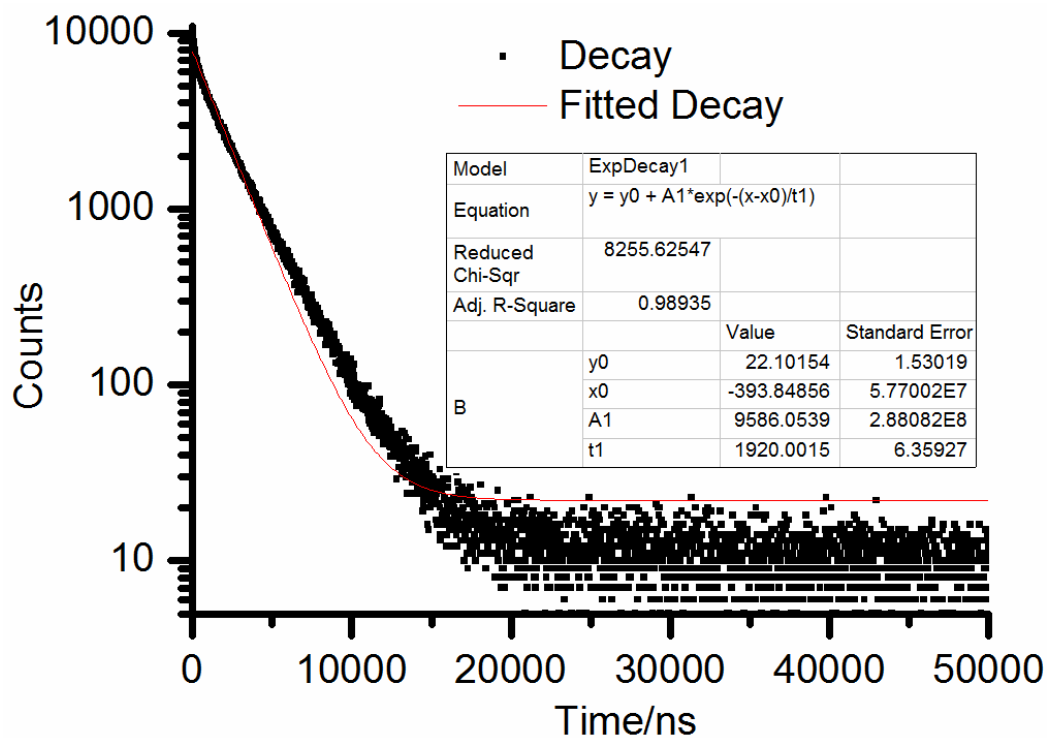

Fig. S23. The decay curve of ground sample of 1·4THF.



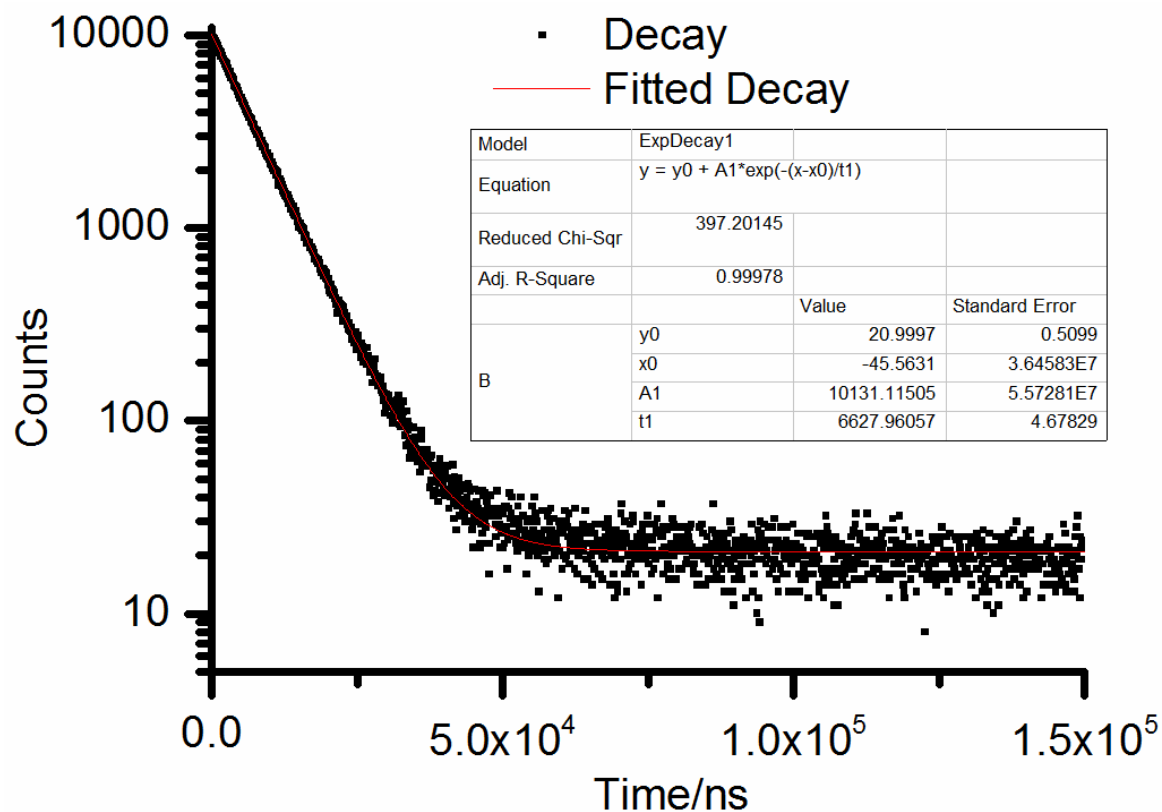

**Fig. S24.** The decay curve of crystal sample of 1·3acetone.

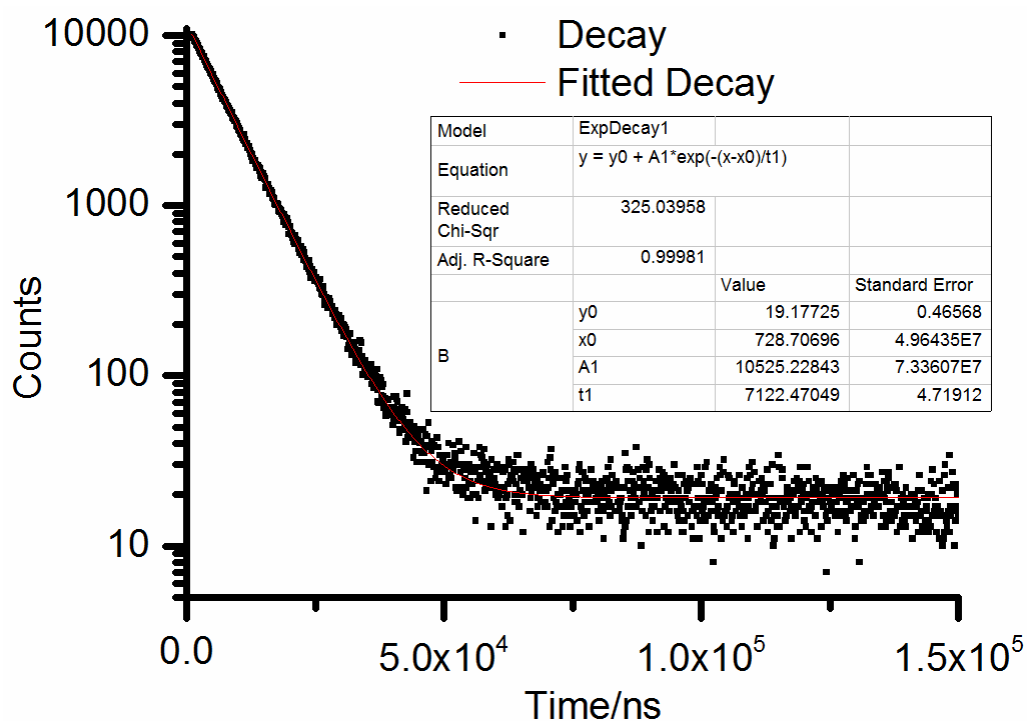

**Fig. S25.** The decay curve of desolvated sample of 1·3acetone.

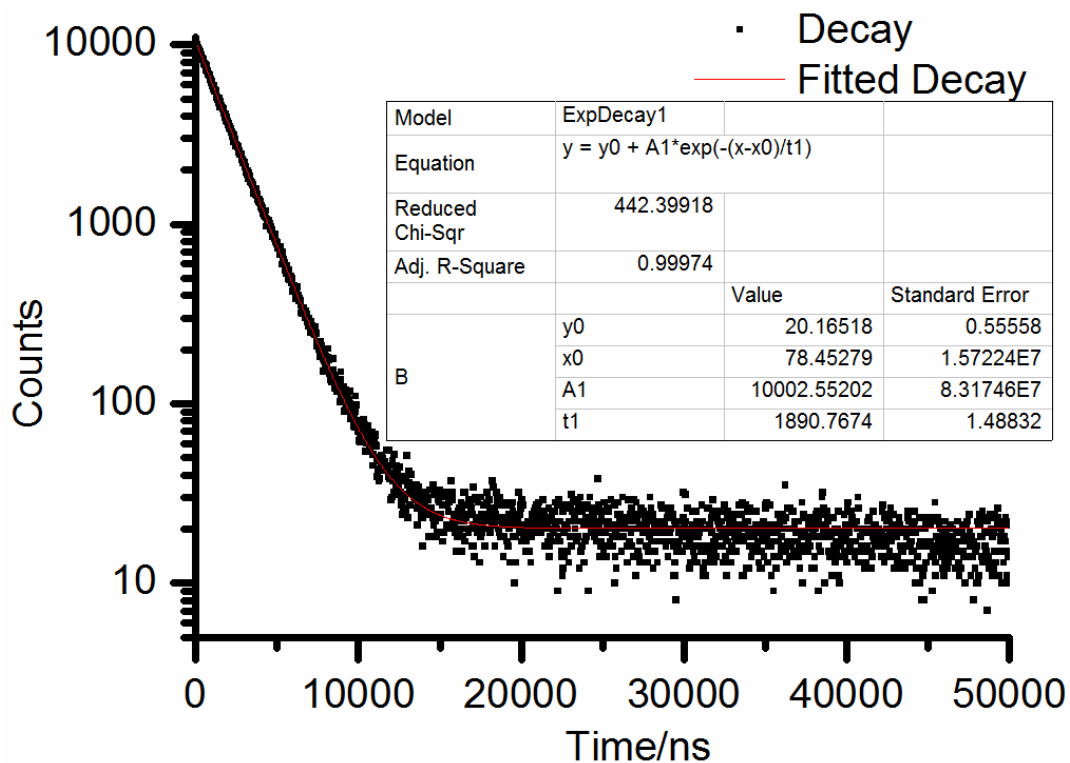

**Fig. S26.** The decay curve of ground sample of 1·3acetone.

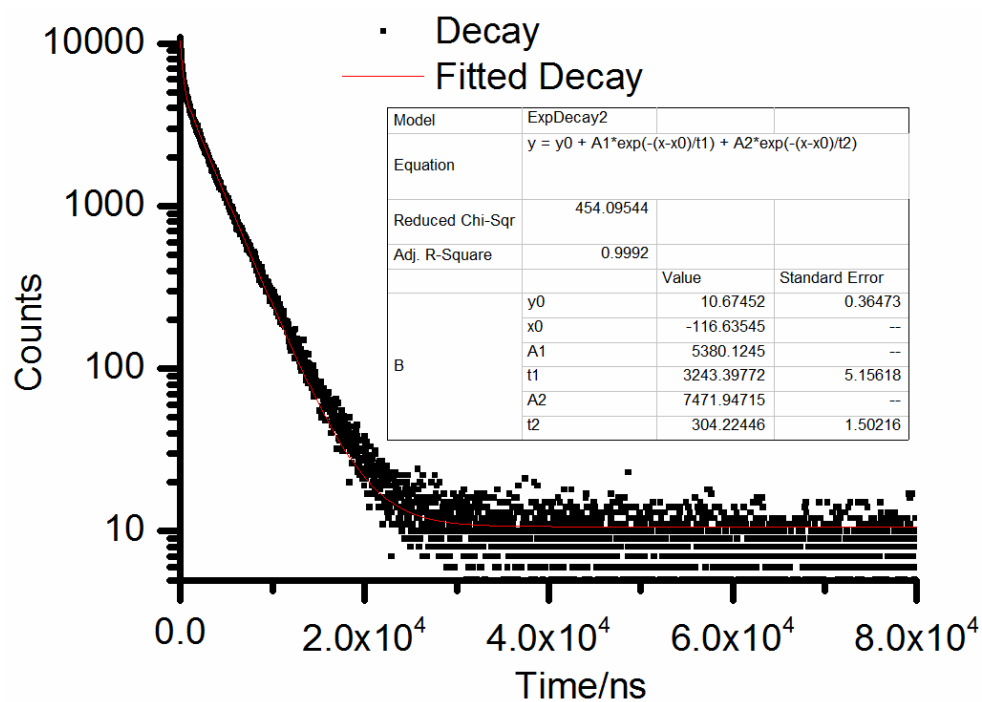

**Fig. S27.** The decay curve of crystal sample of 1·4CH<sub>2</sub>Cl<sub>2</sub>.

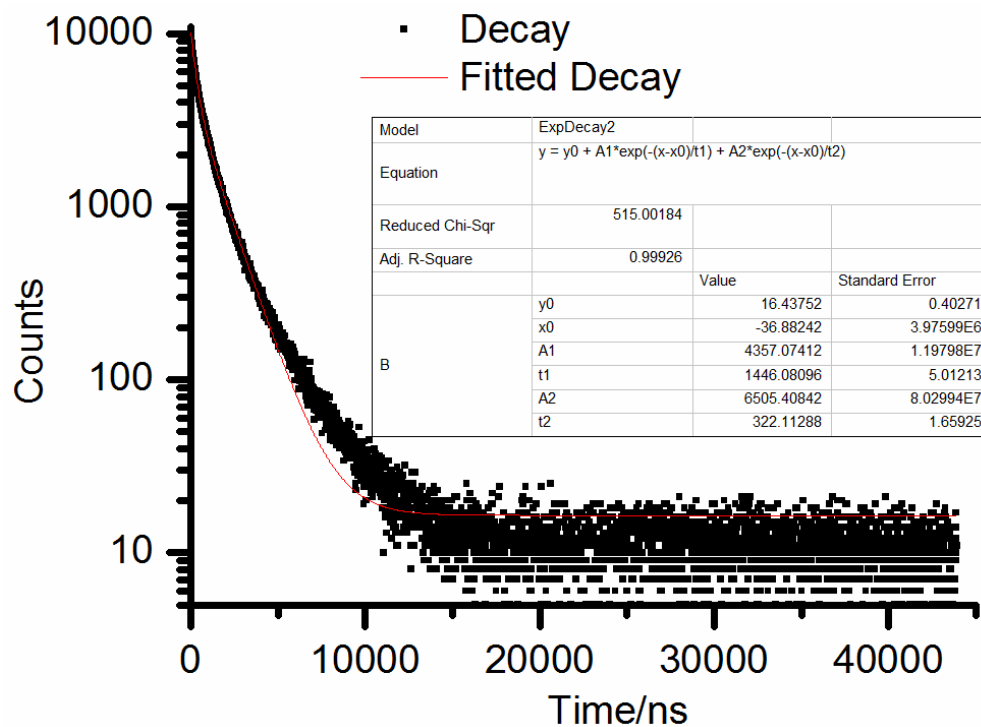

**Fig. S28.** The decay curve of desolvated sample of  $1 \cdot 4\text{CH}_2\text{Cl}_2$ .

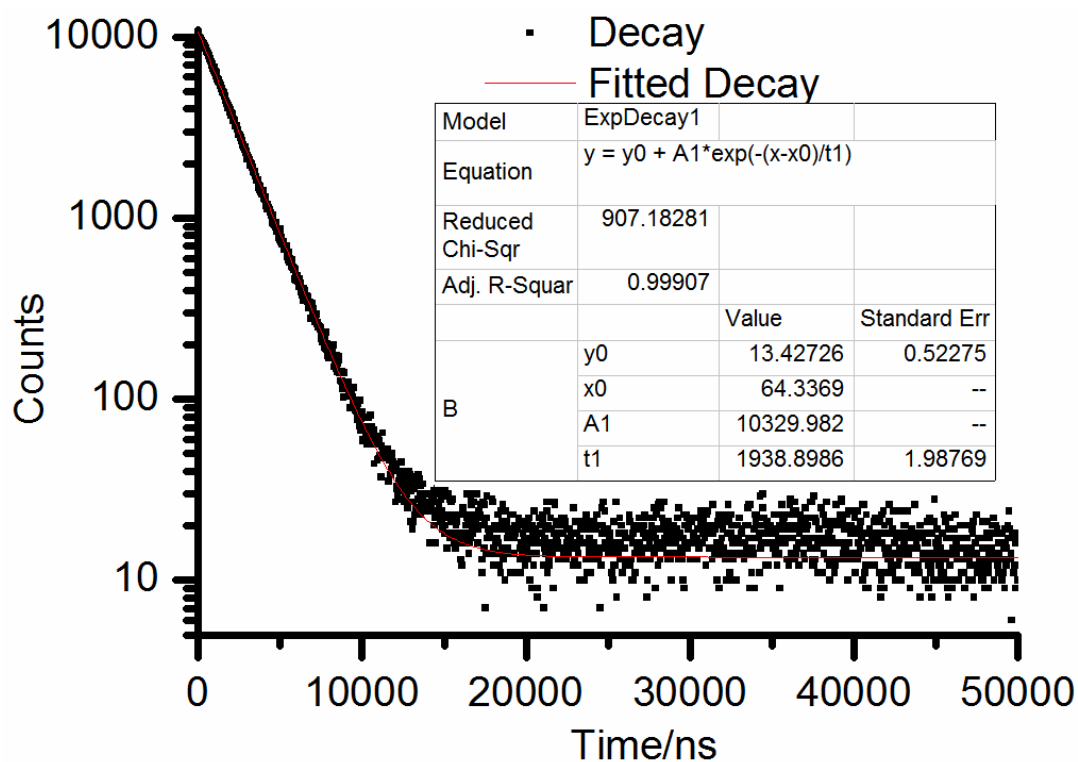

**Fig. S29.** The decay curve of ground sample of  $1 \cdot 4\text{CH}_2\text{Cl}_2$ .

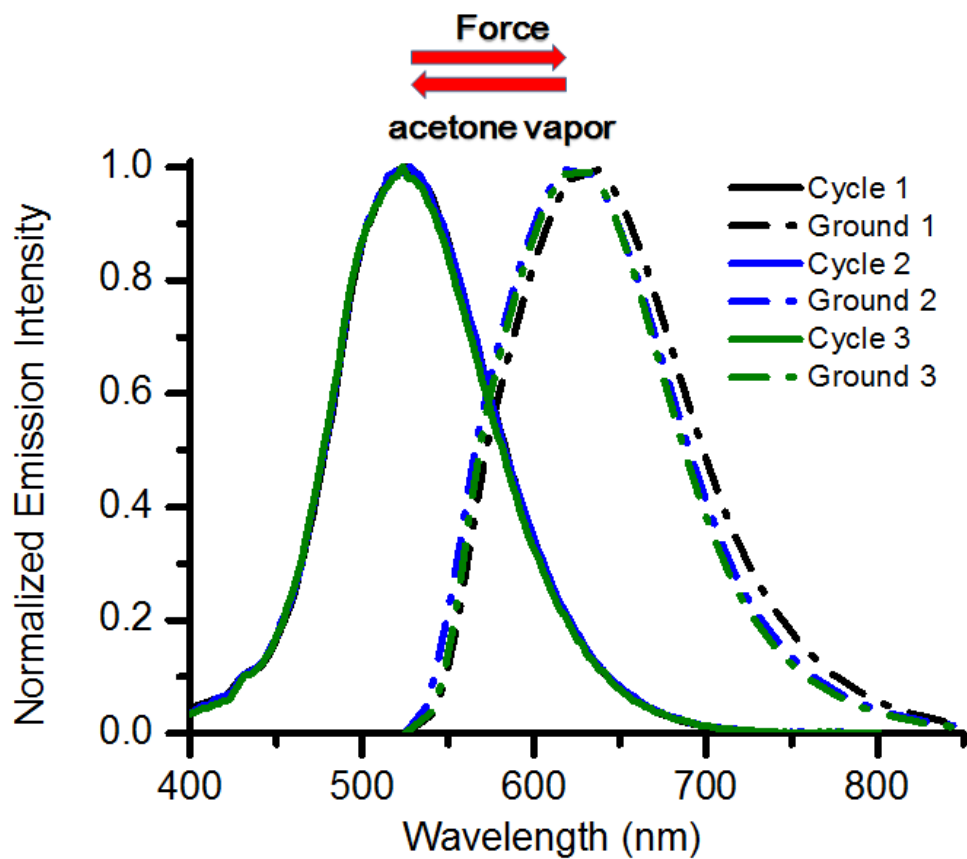

**Fig. S30.** The emission spectra of PMMA film doped with 3% complex **1** for three pressing-restoring cycles.
